# The paradoxical sustainability of periodic migration and habitat destruction

Zong Xuan Tan<sup>1</sup> and Kang Hao Cheong<sup>2,\*</sup>

<sup>1</sup>Yale University, New Haven, CT 06520, United States

<sup>2</sup>Engineering Cluster, Singapore Institute of Technology, 10 Dover Drive, S138683, Singapore

\*Corresponding Author: [Kanghao.Cheong@SingaporeTech.edu.sg](mailto:Kanghao.Cheong@SingaporeTech.edu.sg)

## Abstract

Some species and societies engage in sustainable habitat destruction by periodically alternating between a low-growth migratory lifestyle and high-growth but destructive behavior. Examples include nomadic pastoralism and shifting cultivation, practiced by humans for millenia. Although specific models have been developed for species or societies which practice periodic migration and habitat destruction, theoretical insight into such phenomena as a whole is lacking. Here we present a general model of populations which alternate between migratory but negative-growth ‘nomadism’ and destructive ‘colonialism’ which yields high but short-term growth. Despite both strategies individually resulting in extinction, we demonstrate that a population can sustainably colonize an arbitrarily large network of habitats by alternating between the two. This counter-intuitive result can be interpreted in terms of both Parrondo’s paradox and the exploration-exploitation dilemma, suggesting answers to the question of sustainable development.

## 1 Introduction

A number of species, known as ecosystem engineers<sup>1,2</sup>, are capable of significantly transforming the environments they reside in, with humanity itself the archetypal example. Such species alter their habitats in a way that promotes their survival and growth, at least in the short term. In the long term, these alterations can be destructive and unsustainable, as anthropogenic climate change has shown over the past century or so. Yet, there also exist species and societies that survive in stable oscillation with their environments despite these destructive behaviors<sup>3</sup>. One mechanism by which this is possible is a strategy of periodic alternation between destructive but high-growth and non-destructive but low-growth behaviors<sup>4</sup>. For example, many traditional nomadic pastoralists and shifting cultivators are careful to limit the amount of resource depletion that occurs as a result of grazing or farming. By enduring periods of migration to more abundant habitats when their original habitats are sufficiently depleted, they allow the original habitats to recover and remain usable in the future<sup>5,6,7,8</sup>.

While many attempts have been made to model particular instances of the strategy described above, these models have been highly specific to the society or species under study (e.g. army ants, swidden agriculture, nomadic pastoralism)<sup>9,10,11,12,13</sup>. As a result, there remains a lack of theory and insight into this general category of phenomena, and the broad conditions under which survival and growth are successful remain unknown. Optimal foraging models capture some aspects of migratory behavior after a habitat’s resources are depleted<sup>14,15,16,17</sup>. However, because such models assume that organisms forage so as to optimize locally for fitness, they leave out the possibility of switching to low-growth behaviors to ensure long-term survival. Persistence under habitat destruction has been studied using metapopulation approaches, but these approaches assume that destruction is either a random event or externally caused, rather than directly induced by an organism<sup>18,19,20,21</sup>. Models of migratory ecosystem engineers come closest to including all relevant features<sup>22,23</sup>, but, as with other metapopulation

42 approaches, they neither model such engineers as actively destructive of the environment nor as capa-  
43 ble of switching behaviors.

44 Separately, there have been many studies of organisms that alternate behaviors or switch pheno-  
45 types to promote resilience and survival, even when the behaviors would individually lead to extinc-  
46 tion<sup>24,25</sup>. For example, random phase variation of bacterial phenotypes can ensure subsistence in a  
47 temporally varying environments, despite each phenotype being unfit for survival on its own<sup>26</sup>. In the  
48 realm of ecology, it has been shown that environmental stochasticity can allow a population can per-  
49 sist by migrating between sink habitats only<sup>27</sup>. Apart from our recent study on the topic<sup>4</sup>, however,  
50 there is an absence of research on such counterintuitive ‘reversal behaviors’ in the case of migratory  
51 and environmentally destructive species.

52 As demonstrated in Ref.<sup>4</sup>, the counterintuitive survival of populations which alternate between  
53 non-destructive ‘nomadism’ and destructive ‘colonialism’ can be understood as a manifestation of Par-  
54 rondo’s paradox, which states that there are pairs of losing strategies which can be combined, through  
55 alternation, to win<sup>28,29,30,31,32</sup>. There have been many studies exploring the paradox<sup>33,34,35,36,37</sup>. For in-  
56 stance, the evolution of less accurate sensors<sup>38</sup> and a tumor growth model<sup>39</sup> have been analysed in  
57 terms of the paradox.

58 In the context of our previous study<sup>4</sup>, ‘nomadism’ was used in a broad sense to refer to any be-  
59 havioral strategy that has zero or negative growth but also leaves the environment untouched, while  
60 ‘colonialism’ referred to strategies which rely on some amount of cooperation and have high rates of  
61 short-term growth, but cause environmental destruction in the long run. The former can be seen as  
62 analagous to the ‘agitative’ strategy in the original paradox, or Game A, and the latter can be seen as  
63 analogous to the history-dependent ‘ratcheting’ strategy, or Game B. More precisely, nomadism is the  
64 ‘agitative’ strategy because it allows for environmental resources (analogous to capital in the original  
65 paradox) to recover, whereas colonialism is the ‘ratcheting’ strategy because it can exploit an abundance  
66 of resources for short-term gains, even though those gains are eventually lost through long-term habitat  
67 destruction. Without alternation, both of them result in extinction, but with alternation, colonialism acts  
68 as a ‘ratchet’ by periodically exploiting the environmental resources recovered during prior periods of  
69 nomadism, thereby ensuring survival.

70 Although this analysis of what we termed nomadic-colonial alternation captured many aspects of  
71 practices like nomadic pastoralism and shifting cultivation, it set aside the highly significant role of  
72 inter-habitat migration as part of the nomadic phase of alternation. Such migration can play a cru-  
73 cial role, because it adds an explorative component to nomadism that can counteract the exploitative  
74 nature of colonialism — rather than exploit the current environment to the point of no return, popu-  
75 lations can migrate to nearby habitats with more resources, enabling not just survival, but population  
76 growth. When those habitats are depleted in turn, migration to either the original environment or en-  
77 vironments further out can allow the population to continue its growth. Behavioral alternation in the  
78 migratory context studied here can thus be seen as not just an expression of Parrodo’s paradox, but also  
79 a naturally-occurring solution to the exploration-exploitation dilemma<sup>40,41,42,43</sup>.

80 To understand the dynamics of this strategy, and the conditions which make it sustainable, we de-  
81 veloped and analyzed a general multi-habitat model of nomadic-colonial alternation that incorporates  
82 the process of inter-habitat migration. This paper presents the results of that investigation, revealing  
83 mathematical and theoretical insights that can apply to multiple real-world systems. Most importantly,  
84 it elucidates the conditions under which an environmentally destructive species can sustainably col-  
85 onize an arbitrarily large network of connected habitats through periodic migration. As an ecological  
86 solution to both Parrondo’s paradox and the exploration-exploitation dilemma, the sustainability of this  
87 strategy also suggests intriguing possibilities for better addressing what has been called the ‘paradox  
88 of sustainable development’<sup>44,45,46</sup>.

## 89 2 Population model

90 We model a structured population of individuals spread across  $n$  habitat patches, or nodes. Follow-  
 91 ing the nomadic-colonial model developed in our previous work, the population in each habitat  $i \leq n$   
 92 comprises a sub-population of free-living and migratory nomads,  $x_i$ , and a sub-population of environ-  
 93 mentally destructive colonists,  $y_i$ . Each habitat patch also has an associated carrying capacity  $K_i$ , which  
 94 limits the size of its colonial population.

95 Within each habitat  $i$ , colonists are capable of switching to nomadism at a per-capita rate  $s_i^{xy}$ , and  
 96 nomads to colonialism at a per-capita rate  $s_i^{yx}$ . Nomads also migrate from habitat  $j$  to habitat  $i$  at a  
 97 per-capita rate  $m_{ij}$ , whereas colonists stay in their original habitat unless they switch to nomadism.  
 98 The overall growth rates for the nomadic sub-population  $x_i$  and colonial sub-population  $y_i$  are thus

$$\frac{dx_i}{dt} = g_x(x_i) + s_i^{xy}y_i - s_i^{yx}x_i + \sum_{j \neq i} m_{ij}x_j - \sum_{j \neq i} m_{ji}x_i \quad (1)$$

$$\frac{dy_i}{dt} = g_y(y_i) + s_i^{yx}x_i - s_i^{xy}y_i \quad (2)$$

100 where  $g_x$  and  $g_y$  are respectively the endogenous nomadic and colonial growth rates (i.e. the growth  
 101 rates in the absence of both behavioral switching and migration), to be defined below.

### 102 2.1 Nomadism

103 Nomads are primarily distinguished from colonists by their ability to migrate to other habitats, as al-  
 104 ready reflected in Equation 1. They also have a negligible impact on their environment. We restrict our  
 105 model to the case where pure nomadism leads to extinction in the long run. The endogenous growth  
 106 rate of the nomadic population  $x_i$  in habitat  $i$  is thus given by

$$g_x(x_i) = -r_x x_i \quad (3)$$

107 with nomadic decay constant  $r_x > 0$ . This restriction is made for two reasons: Firstly, it captures the  
 108 harsh conditions that nomads often experience while migrating to a new, uncolonized habitat. Secondly,  
 109 any positive results that are obtained, such as population survival through periodic migration, can then  
 110 be easily extended to the case where nomadic conditions are more favorable. If survival is ensured  
 111 under poor conditions, then it can be ensured under better conditions as well.

### 112 2.2 Colonialism

113 Colonists are distinguished by the following features: they are subject to both cooperative and com-  
 114 petitive effects, and they exploit their environment in order to grow, thereby causing long-term habitat  
 115 destruction. Cooperation and competition are accounted for in the endogenous growth rate  $g_y$  by a  
 116 modified logistic equation with carrying capacity  $K_i$ , Allee capacity  $A$ , and colonial growth constant  
 117  $r_y > 0$ :

$$g_y(y_i) = r_y y_i \left( \frac{y_i}{\min(A, K_i)} - 1 \right) \left( 1 - \frac{y_i}{K_i} \right) \quad (4)$$

118 It can be seen that the growth rate is negative when  $y_i < \min(A, K_i)$ , a phenomenon known as the  
 119 strong Allee effect. This captures the necessity of cooperation — colonists need to exceed the critical  
 120 mass  $A$  in order to collectively survive. The growth rate is also negative when  $y_i$  exceeds the carrying  
 121 capacity  $K_i$ , due to overcrowding and excessive competition. Positive growth is only achieved when  
 122  $A < y_i < K_i$ , i.e., when the colonial population is neither too large nor too small.

123 Long-term habitat destruction is accounted for by modelling changes in the carrying capacity  $K_i$  as  
 124 negatively dependent upon the colonial population  $y_i$ . Specifically, the rate of change of is given by

$$\frac{dK_i}{dt} = \alpha \cdot \mathbf{1}_{K_i < K_{\max}} - \beta_i y_i \quad (5)$$

125 where  $\alpha > 0$  is the default growth rate of  $K_i$ ,  $\beta > 0$  is the per-capita rate of habitat destruction,  $K_{\max}$  is  
 126 the maximum possible carrying capacity, and  $\mathbf{1}_{K_i < K_{\max}}$  is the indicator function which evaluates to one  
 127 when  $K_i < K_{\max}$ , and evaluates to zero otherwise. The indicator function ensures that  $K_i$  is limited to  
 128 a finite maximum of  $K_{\max}$ , accounting for the fact that the resources in any single habitat cannot grow  
 129 infinitely large. This assumption has no effect as long as  $K_i$  remains below  $K_{\max}$ , but serves as a useful  
 130 simplification of other models which limit the growth of  $K_i$  more gradually (e.g., the logistic model  
 131 presented in Ref. 4).

132 From Equation 5, we can deduce a habitat-stable population level:

$$y^* = \frac{\alpha}{\beta} \quad (6)$$

133 At this population level ( $y_i = y^*$ ), no habitat destruction occurs ( $\frac{dK_i}{dt} = 0$ ). When the colonial population  
 134  $y_i$  exceeds this level, the carrying capacity decreases, and vice versa. Thus,  $y^*$  can also be understood  
 135 as the long-term carrying capacity of any particular habitat. If this long-term carrying capacity is less  
 136 than the Allee capacity  $A$ , the short-term capacity  $K_i$  will eventually decrease until it can no longer  
 137 sustain the critical mass  $A$  required for colonists to grow. Under these conditions, pure colonialism will  
 138 be unsustainable in the long run as well.

### 139 2.3 Behavioral alternation

140 When should a group of nomads colonize a habitat, and when should the colony then revert to no-  
 141 madism? A simple and natural rule to follow is to colonize the habitat when resources are abundant,  
 142 and to switch back to nomadism when resources become depleted, allowing for the exploration of  
 143 other potential habitats. In accordance with this reasoning, we model the population in each habitat  $i$   
 144 such that it switches to nomadism from colonialism when the carrying capacity is low ( $K_i < L_1$ ), and  
 145 switches to colonialism from nomadism when the carrying capacity is high ( $K_i > L_2$ ). Here,  $L_1 \leq L_2$   
 146 are the switching levels that trigger the alternation of behaviors, assumed to be constant across the en-  
 147 tire population. Let  $r_s > 0$  be the switching constant. The colonial-to-nomadic switching rate  $s_i^{xy}$  and  
 148 the nomadic-to-colonial switching rate  $s_i^{yx}$  can then be expressed as follows:

$$s_i^{xy} = \begin{cases} r_s & \text{if } K_i < L_1 \\ 0 & \text{otherwise} \end{cases} \quad s_i^{yx} = \begin{cases} r_s & \text{if } K_i > L_2 \\ 0 & \text{otherwise} \end{cases} \quad (7)$$

149 It should be noted that the decision to switch need not always be ‘optimal’ or promote ‘rational’  
 150 self-interest (i.e. result in a higher growth rate for each individual). The decision behavior could be  
 151 genetically programmed or culturally ingrained, such that ‘involuntary’ individual sacrifice promotes  
 152 the long-term survival of the population.

### 153 2.4 Reduced parameters

154 Without loss of generality, we scale all parameters such that  $\alpha = \beta = 1$ . Equation 5 thus becomes:

$$\frac{dK_i}{dt} = \mathbf{1}_{K_i < K_{\max}} - y_i \quad (8)$$

155 Under this scaling, the habitat-stable population size becomes  $y^* = \frac{\alpha}{\beta} = 1$ , and all other population  
 156 sizes and capacities are to be interpreted as ratios with respect to  $y^*$ . Additionally, since the per-capita  
 157 rate of habitat destruction  $\beta = 1$ ,  $r_x$ ,  $r_y$  and  $r_s$  are to be interpreted as ratios to this rate. As an illus-  
 158 tration, if  $r_y \gg 1$ , this means that colonial growth occurs much faster than habitat destruction. Setting  
 159  $r_x, r_y \gg 1$  thus achieves time-scale separation between the population growth dynamics and the habitat  
 160 change dynamics. Setting  $r_s \gg r_x, r_y$  likewise ensures separation between the dynamics of behavioral  
 161 switching and population growth.

## 162 3 Methods

163 MATLAB R2017a (MathWorks) was used to perform numerical simulations with the included *ode23*  
164 ordinary differential equation (ODE) solver. *ode23* implements the Runge-Kutta (2,3) formula pair by  
165 Bogacki and Shampine<sup>47</sup>. Accuracy was ensured by repeating each result with consecutively more  
166 stringent tolerance levels until the output did not change significantly (i.e. a difference of less than 1%).  
167 Both the relative error tolerance and absolute error tolerance were fixed at  $10^{-6}$  after this process.

168 Exploratory simulations were first conducted for a small number of habitat patches over wide range  
169 of parameters and initial conditions. General trends observed from these simulations were then used to  
170 guide systematic investigation into the dynamics of migration and colonization. The dynamics of colo-  
171 nization were studied by limiting the initial conditions such that they were progressively less favorable  
172 for successful colonization (e.g. by reducing the initial carrying capacities). The observed trends and  
173 conditions were then formalized analytically. These conditions were then used to find parameters that  
174 ensured survival and expansion for simulations conducted with a large number of habitats.

175 In deriving these conditions, reasonable assumptions were made in order to make the model analyt-  
176 ically tractable. In particular, it was assumed that the rate of behavioral switching was much faster than  
177 all other processes ( $r_s \gg r_x, r_y, m_{ij}, 1$ ), and that colonial growth rates were much faster than the rate of  
178 habitat destruction ( $r_y \gg 1$ ). Initial conditions which result in unstable equilibria (e.g.  $y_i = K_i = 1 < A$ )  
179 were avoided as unrealistic.

## 180 4 Results

181 Simulations over a range of parameters showed that the strategy of nomadic-colonial alternation we  
182 previously demonstrated to ensure survival in a single habitat was also capable of ensuring survival  
183 when extended to multiple habitats. The results also showed that a population localized to a single  
184 habitat was capable of colonizing adjacent habitats when resources grew scarce, and then periodically  
185 recolonize its original habitat whenever the resources there grew abundant again. Through this strat-  
186 egy of periodic recolonization, a single colony was capable of sustainably expanding to populate all  
187 connected habitats in a simulated network, thereby demonstrating that under the right strategy, habitat  
188 destruction does not prevent sustainable growth.

189 Sufficient conditions for the emergence of these phenomena were derived analytically, and are pre-  
190 sented in the relevant sections below. As with our work on the single-habitat case, we restrict our results  
191 to the case of large switching rates ( $r_s \gg r_x, r_y, m_{ij}, 1$ ), which reflect scenarios where behavior switch-  
192 ing can occur more or less instantaneously (i.e. within a fraction of an individual's lifespan, as is the  
193 case for changes in human and animal behavior). This restriction also makes for both conceptual clarity  
194 and analytical simplicity, allowing for general insights which can be extended to cases where switching  
195 rates are relatively slow as well.

### 196 4.1 Survival through periodic migration

197 As noted in our description of the model, neither pure nomadism nor pure colonialism alone can ensure  
198 survival when the habitat-stable population level  $y^* = 1$  is smaller than the Allee capacity  $A$ . However,  
199 as shown in Ref.<sup>4</sup>, a population in a single habitat can ensure survival through nomadic-colonial al-  
200 ternation. Survival was achieved because periodically switching to nomadism allowed the carrying  
201 capacity of the habitat to recover after periods of colonial exploitation, and switching to colonialism al-  
202 lowed population levels to recover after periods of nomadic attrition. Unsurprisingly, this finding can  
203 be extended to an arbitrary number of isolated habitats (i.e., habitats with no migration between them).  
204 Here our results show that *with* the addition of inter-habitat migration, periodic alternation between  
205 nomadism and colonialism can ensure survival as well.

206 Figures 1 and 2 show respectively the survival of populations which periodically migrate between  
207 2 and 3 connected habitats, with equal migration constants  $m_{ij} = 5$  between all of them. We primarily

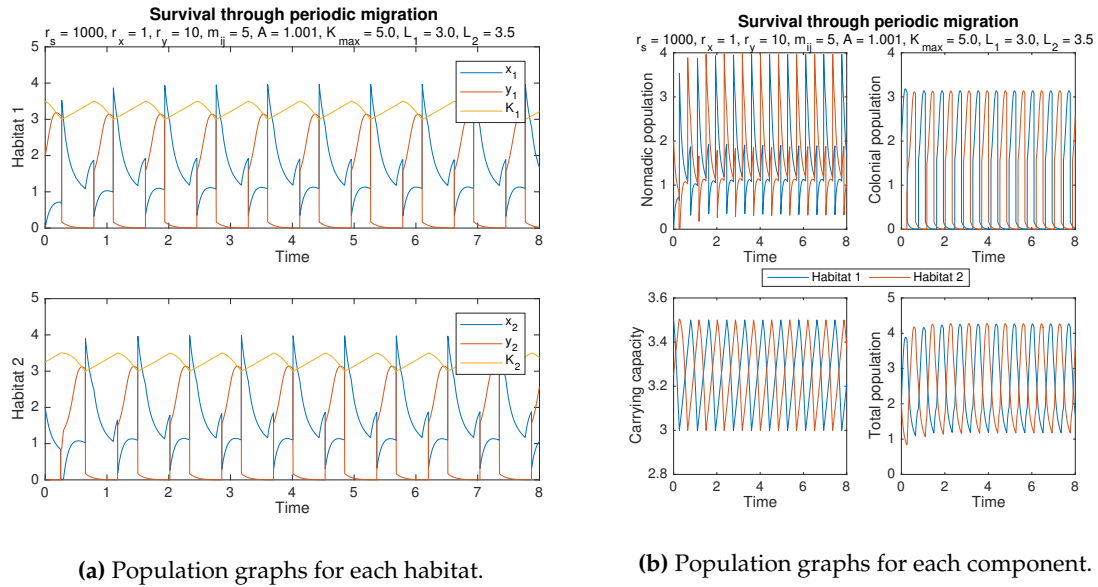

**Figure 1:** By periodically alternating behaviors and migrating between two habitats, the population ensures its survival. Initial conditions are  $x = [0, 2], y = [2, 0], K = [3.5, 3.25]$ . Other parameters are  $r_s = 1000, r_x = 1, r_y = 10, \forall i, j, m_{ij} = 5, A = 1.001, K_{max} = 5.0, L_1 = 3.0$ , and  $L_2 = 3.5$

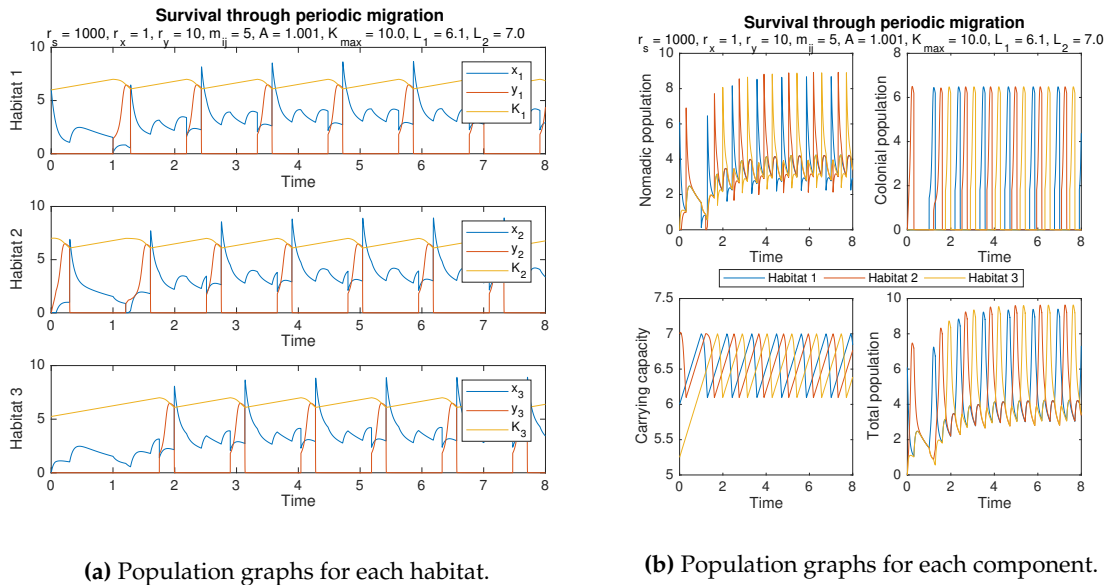

**Figure 2:** Survival can also be ensured by periodic migration between three habitats, as shown here. Initial conditions are  $x = [6.1, 0, 0], y = [0, 0, 0], K = [6, 7, 5.25]$ . Other parameters are  $r_s = 1000, r_x = 1, r_y = 10, \forall i, j, m_{ij} = 5, A = 1.001, K_{max} = 10.0, L_1 = 6.1$ , and  $L_2 = 7.0$ .

208 explain the mechanics with respect to Figure 1 because the dynamics of the two-habitat case can easily  
209 be generalized to a larger number of habitats. In Figure 1, habitat 1 is initially populated with colonists,  
210 and habitat 2 with nomads. As time passes, it can be seen from Figure 1a that each habitat period-  
211 ically switches between nomadic and colonial phases — periods of time during which nomadism or  
212 colonialism, respectively, are dominant. Furthermore, it can be seen from Figure 1b that the two habi-  
213 tats alternate phases — when nomadism is dominant in habitat 1, colonialism is generally dominant  
214 in habitat 2, and vice versa. Hence, when nomads (or colonists) are abundant in habitat 1, they are  
215 correspondingly scarce in habitat 2.

216 Importantly, when each habitat switches to the nomadic phase (e.g. at  $t \simeq 0.75$  in habitat 2), there  
217 is a resultant influx of migratory nomads into the adjacent habitat, causing a sudden increase in the  
218 nomadic population of that habitat (e.g.  $t \simeq 0.75$  in habitat 1). Sometimes a jump in the number of  
219 colonists happen instead, because incoming nomads immediately switch behaviors to colonialism (e.g.  
220 at  $t \simeq 0.25$  in habitat 2). Similar phenomena can be observed in Figure 2, except that in the three-habitat  
221 case, several growth spikes occur during each nomadic phase due to migratory influxes from multiple  
222 neighbors (e.g. between  $t \simeq 2$  and  $t \simeq 3$  in the third habitat of Figure 2a).

223 Survival is achieved for two related reasons. The first is essentially the same as what has been ex-  
224 plained for the case of a single habitat. By periodically switching to nomadism, the population in each  
225 habitat prevents the resources in that habitat from being depleted, allowing each habitat to be recolo-  
226 nized once resources are abundant again. The second is due to the additional effects of migration. When  
227 the population in one habitat switches to nomadism, it then migrates to all adjacent habitats, which then  
228 act as a “store” for these nomads. This is particularly effective when those adjacent habitats are near the  
229 start of the colonial phase, because the nomads can join the newly-formed colonies and enjoy a period  
230 of exponential growth, resulting in a larger population. When this larger population switches back to  
231 nomadism, it is better able to recolonize the original habitat once resources there are replenished. Thus,  
232 survival is promoted not simply through the strategy of periodic behavioral alternation, but through  
233 periodic migration and colonization.

## 234 4.2 Colonization of unoccupied habitats

235 Given that the mutual survival of adjacent habitats is enabled by periodic colonization, understanding  
236 the dynamics of colonization provides greater insight into the sufficient conditions for survival. In par-  
237 ticular, it is useful to examine the colonization of an initially unoccupied habitat, because the conditions  
238 which are sufficient for colonizing an unoccupied habitat will also be sufficient for colonizing a habitat  
239 which already has a small number of inhabitants.

240 As an illustration, we analyze the case where a habitat  $j$  being colonized is already abundant in  
241 resources – i.e.,  $K_j > L_2$  at the onset of colonization. Prior to onset, habitat  $j$  is devoid of inhabitants.  
242 Figure 3 depicts two such scenarios, where habitat 1 is the source, habitat 2 is the new colony, and  $t = 0$   
243 is the onset of colonization. In both scenarios, nomads migrate from habitat 1 to habitat 2, and then  
244 switch behaviors from nomadism to colonialism because  $K_2 > L_2 = 3.5$ .

245 Colonization ultimately fails in Figure 3a because of the insufficient number of nomads  $x_1 = 2.0$  in  
246 habitat 1 initially. In Figure 3b however, habitat 1 is initially populated with enough nomads ( $x_1 = 3.0$ ),  
247 so the colony in habitat 2 is able to exceed the Allee capacity  $A$  due to migration from habitat 1, and  
248 from there survive on its own. The population in habitat 2 is then able to re-colonize habitat 1, following  
249 which survival through periodic migration ensues.

250 Multiple factors besides the initial number of nomads influence the success of colonization. Higher  
251 rates of nomadic or colonial decay make colonization more difficult, as does a higher Allee capacity  
252  $A$ . Rapid migration into a destination habitat makes success more likely, but this has to be balanced  
253 against the number of destination habitats that the source population is simultaneously migrating to. If  
254 the source tries to colonize too many neighboring habitats at once, not only will it be quickly depleted of  
255 nomads without any success. Taking into account all these factors, the following sufficient condition for

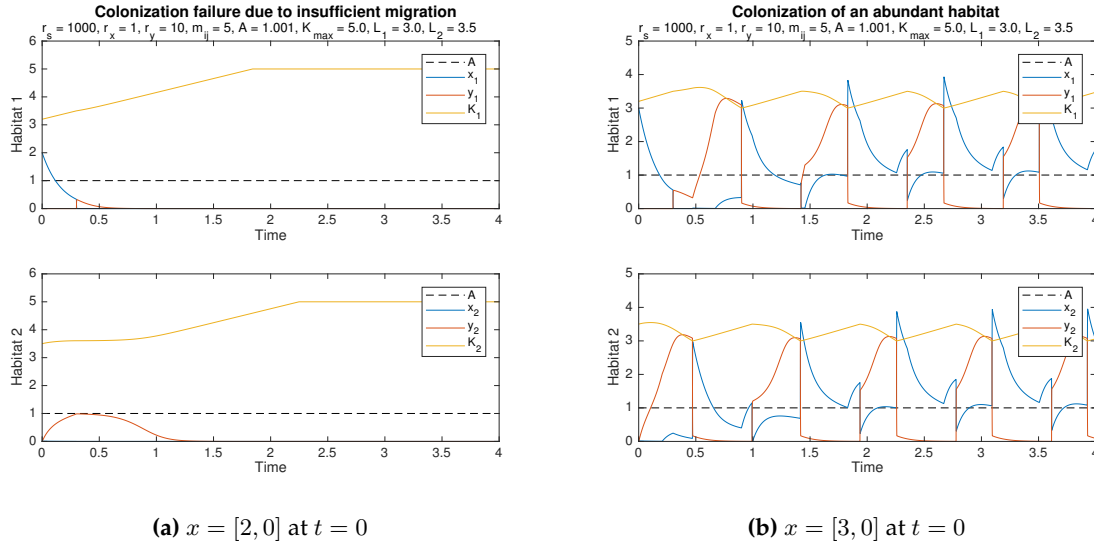

**Figure 3:** Colonization fails in (a) because of the insufficient number of nomads  $x_1$  in habitat 1 at  $t = 0$ , but succeeds in (b) because the initial number  $x_1(0)$  is higher. Shared initial conditions are  $y = [0, 0]$ ,  $K = [3.2, 3.5]$ . Other parameters are  $r_s = 1000$ ,  $r_x = 1$ ,  $r_y = 10$ ,  $\forall i, j$ ,  $m_{ij} = 5$ ,  $A = 1.001$ ,  $K_{\max} = 5.0$ ,  $L_1 = 3.0$ , and  $L_2 = 3.5$ .

256 colonization can be derived (under the assumption of rapid behavioral switching  $r_s \gg r_x, r_y, m_{ij}, 1$ ):

$$\frac{x_i^{\text{init}}}{A} \geq \frac{e}{2m_{ji}}(r_x + r_y + M_i) \quad (9)$$

257 Here  $i$  is the source habitat,  $j$  the destination habitat,  $x_i^{\text{init}}$  be the initial nomadic population in the source,  
 258 and  $M_i = \sum_{k=1}^n m_{ki}$  be the total outbound migration constant from  $i$ . Intuitively, Inequality 9 states  
 259 that colonization is successful if the ratio of the initial number of nomads  $x_i^{\text{init}}$  to the Allee capacity  $A$   
 260 exceeds a lower bound defined by the rate parameters.

261 Analyzing this lower bound gives further insights. Firstly, the bound can be seen to increase with  
 262 the nomadic decay constant  $r_x$ , because more nomadic deaths means less nomads are able to colonize  
 263 the new habitat. Hence,  $x_i^{\text{init}}$  needs to be higher to compensate. The bound also increases with the  
 264 colonial growth constant  $r_y$ . Though counter-intuitive, this is because during colonization, the number  
 265 of colonists  $y_j$  is less than  $A$ , and so the rate of endogenous nomadic growth  $g_y$  is both negative and  
 266 approximately proportional in magnitude to  $r_y$ . Increasing the total outbound migration constant  $M_i$   
 267 makes the bound higher as well, because more migration means that the initial nomadic population is  
 268 more quickly depleted. On the other hand, increasing the migration constant  $m_{ji}$  to habitat  $j$  makes the  
 269 bound smaller, because more of the migrants go directly to habitat  $j$  instead of other habitats adjacent  
 270 to the source.

271 Other colonization dynamics are possible besides the case just analyzed. Specifically, colonization  
 272 of both near-abundant and barren habitats can also occur. In general, it is possible to find conditions  
 273 which allow for successful colonization in all of these cases.

### 274 4.3 Periodic recolonization of habitats

275 The above analysis suggests that the initial colonization of habitat  $j$  is ensured as long as  $x_i^{\text{init}}$  is suffi-  
 276 ciently high, but they can also be extended to cover subsequent periods of colonization (e.g., at  $t = 1$  in  
 277 habitat 2 of Figure 3b). As can be seen in habitat 1 of Figure 3b, whenever the source habitat enters the  
 278 nomadic phase, its nomadic population  $x_i$  is at a level of  $L_1$  or above. This occurs because the colonial  
 279 population  $y_i$  quickly grows to reach  $K_i$  during the preceding colonial phase. When the switch to no-  
 280 madism occurs (at which point  $y_i \simeq K_i \simeq L_1$ ), close to all of the colonists switch behaviors, such that  
 281 the nomadic population  $x_i$  increases almost instantaneously by an amount close to  $L_1$ . From this point



282 on, the source habitat  $i$  has a pool of at least  $L_1$  nomads with which it can re-colonize adjacent habitats.  
283 Assuming that the adjacent habitats are abundant at this point in time, we can then replace  $x_i^{\text{init}}$  with  $L_1$   
284 in Inequality 9 to obtain conditions for periodic re-colonization:

$$\frac{L_1}{A} \geq \frac{e}{2m_{ji}}(r_x + r_y + M_i) \quad (10)$$

285 No doubt, there are some circumstances where this specific chain of events does not occur. The colo-  
286 nial growth constant  $r_y$  might not be large enough for  $y_i$  to reach  $K_i$  during the colonial phase, and the  
287 adjacent habitats might not always be abundant when the colonial phase begins in the source. How-  
288 ever, these circumstances are mitigated by the fact that, once initial colonization of the adjacent habitats  
289 has occurred, the total population in those habitats is generally non-zero, making re-colonization easier  
290 in the future. Inequality 10 thus serves as a useful guide for finding parameters that result in periodic  
291 colonization and survival. Simulation results confirm that satisfying this condition generally produce  
292 the desired outcomes.

#### 293 4.4 Sustainable expansion through periodic colonization

294 With the results derived, it becomes possible to find parameters under which a single population can  
295 expand to colonize all connected habitats in an arbitrarily large network. Due to the strategy of periodic  
296 behavioral alternation, such outward expansion is sustainable despite the environmentally destructive  
297 nature of colonialism. The derived inequalities suggest that expansion is successful across the entire  
298 network when the initial population and the switching level  $L_1$  are sufficiently high. Furthermore,  
299 for every pair of connected neighbors  $i$  and  $j$ , the migration constant  $m_{ji}$  should be sufficiently large,  
300 while the total outbound migration constant  $M_i$  should be kept small.

301 Simulation results demonstrate that sustainable expansion is indeed possible when these considera-  
302 tions are taken into account. Figure 4 shows the population levels over time as a single colony expands  
303 to fill a network of  $n = 30$  habitats, and Figure 5 shows a visualization of the network as the population  
304 spreads from habitat 1. The color bars indicate the corresponding scale, with red representing higher  
305 numbers and blue representing lower numbers.

306 It can be observed in Figure 5 that the population successfully spreads from the initial colony in  
307 the top-right corner of the network to eventually populate all habitats in the network. Figure 4 further  
308 shows how this expansion occurs through the same process of periodic migration and colonization  
309 described in previous sections. This can be seen most clearly by examining the colonial population  
310 levels depicted in the top-right panel of Figure 4. Each row of this panel shows the population levels of  
311 a particular habitat, with the rows arranged such that habitats which are colonized first are closer to the  
312 top. Initially, only habitat 1 is populated and abundant enough to periodically sustain a population of  
313 colonists for short intervals of time. These intervals (i.e. the colonial phases) correspond to the bright  
314 orange bars in the first row, whereas all other rows remain deep blue because the habitats they represent  
315 are unoccupied. Nearby habitats get colonized by migrants when they grow to have sufficient resources  
316 (i.e.  $K_i > L_2$ ), following which they enter a pattern of periodic migration and recolonization. This can  
317 be seen from the bright orange bars that eventually appear in every row.

318 Similar periodicity can be seen emerging across habitats for both the nomadic population and the  
319 carrying capacity. In the case of the nomadic population, the periodicity that can be seen (top-left panel  
320 of Figure 4) is less pronounced, since the nomadic phase in each habitat lasts a longer period of time.  
321 The periodic alternation of carrying capacity is even less stark (bottom-left panel of Figure 4), because  
322  $K_i$  of each habitat  $i$  just alternates between  $L_1 = 10$  and  $L_2 = 11$  after colonization occurs. Prior  
323 to colonization,  $K_i$  may increase to values as high as  $K_{\text{max}} = 15$ , before migrants finally arrive and  
324 deplete all the excess resources.

325 The results in Figures 4 and 5 show that expansion is achievable for a network of  $n = 30$  habitats  
326 under certain initial conditions, but this also extends to networks which are arbitrarily large as long as  
327 their maximal degree  $d_{\text{max}}$  is limited. To some degree, expansion was successful in Figures 4 and 5 be-  
328 cause habitats nearby the source were sufficiently abundant and could thus be colonized. Nonetheless,

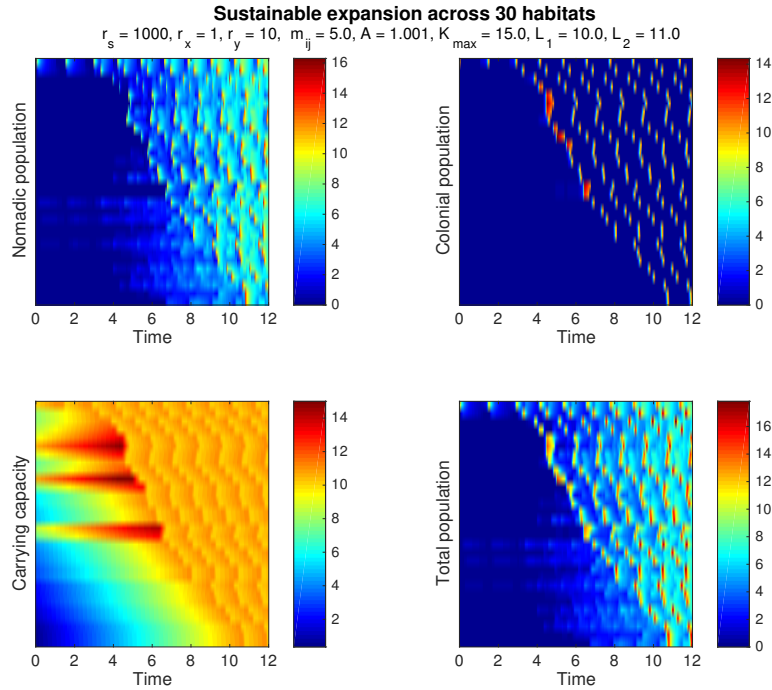

**Figure 4:** Population and capacity levels over time for a 30-habitat network. Each row of every subplot corresponds to a particular habitat, and the rows are sorted by initial time of colonization (i.e., the time at which  $y_i$  exceeds  $A$  for each habitat  $i$ ). Initial values for the source colony were  $x_1 = 0, y_1 = 10.5$  and  $K_1 = 11$ . All other habitats were initially empty ( $x_i = y_i = 0$ ), with carrying capacities  $K_i$  distributed uniformly at random between 0 and 11. Other parameters are  $r_s = 1000, r_x = 1, r_y = 10, \forall i, j, m_{ij} = 5, A = 1.001, K_{\max} = 15, L_1 = 10$ , and  $L_2 = 11$ .

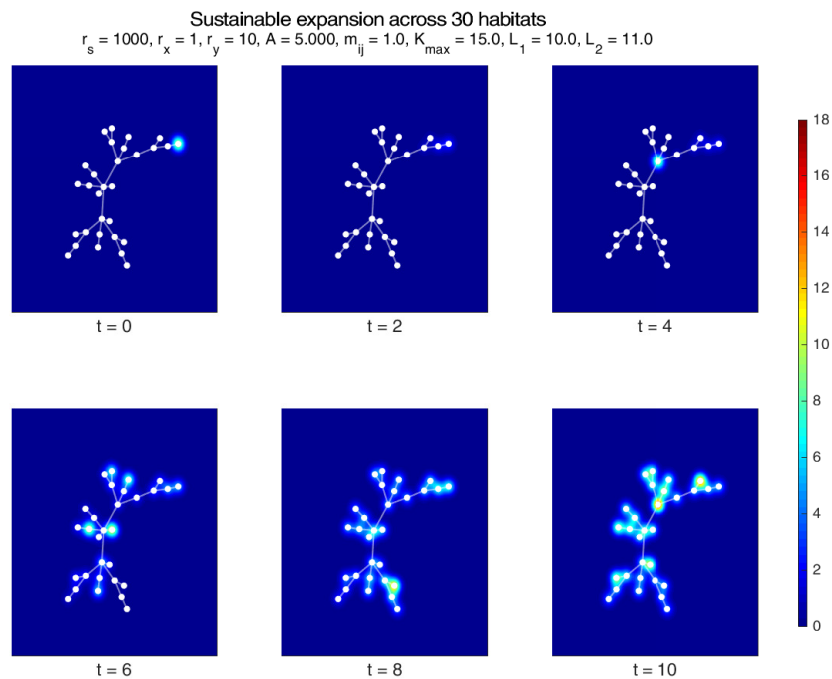

**Figure 5:** A graphical visualization of the population in Figure 4 spreading across the habitat network, with snapshots taken at various points in time. A 2D Gaussian with a peak value of  $x_i(t) + y_i(t)$  is plotted at the corresponding node for each habitat  $i$ , allowing the total population in each habitat to be visualized.

329 parameters can be found such that expansion is also successful under more general circumstances, in-  
330 cluding cases where barren habitats are present, and where the maximal carrying capacity  $K_{\max}$  differs  
331 across habitats. In general, sustainable expansion across an arbitrarily large network can be guaranteed  
332 over a wide range of circumstances.

## 333 5 Discussion

334 By proposing a general model of populations that periodically alternate between explorative nomad-  
335 like strategies and exploitative colony-like behaviors, our research provides both mathematical under-  
336 standing and theoretical unity for a wide range of biological and socio-ecological phenomena. Such  
337 phenomena include not just the behavioral alternation of ant colonies<sup>9</sup> slime moulds<sup>48</sup>, and similar or-  
338 ganisms, but also the subsistence strategies of shifting cultivation and nomadic pastoralism that have  
339 long been used by humankind.

340 As explained before, the success of nomadic-colonial alternation as a survival strategy can be under-  
341 stood as a manifestation of Parrondo's paradox. In the present study however, nomadism is also *explo-*  
342 *rative* in nature, allowing the population to discover and benefit from new and abundant habitats. This  
343 exploration comes at the cost of abandoning a still livable habitat for the harsher conditions of nomadic  
344 migration, but it also limits and counteracts the long-term damage of colonialism, which can be under-  
345 stood as *exploitative* in character. Short-term exploitation creates growth that sustains the population as  
346 a whole, but over-exploitation of a single habitat makes pure colonialism unviable. Periodic exploration  
347 counteracts this not only by limiting the duration of colonialism in any single habitat, but also by find-  
348 ing abundant habitats nearby for the population to exploit instead. By balancing these two processes  
349 (thereby satisfying the analytic conditions we have derived), their long-term negative consequences are  
350 mitigated, while their short-term positive consequences are preserved. Indeed, appropriately making  
351 these trade-offs can be seen as analogous to the exploration-exploitation dilemma<sup>40,41,42,43</sup>. Our results  
352 ultimately demonstrate that even when nomadism is so harsh and colonialism so destructive that ei-  
353 ther alone would lead to extinction in the long run, a population can still spread sustainably across all  
354 reachable habitats.

355 Applying these insights helps explain the success of similar strategies in nature, humanity included.  
356 In nomadic pastoralism, groups of pastoralists allow their cattle to graze on fresh pastures until they are  
357 somewhat depleted, following which they migrate to find new pastures. In shifting cultivation, agricul-  
358 turalists cut down areas of forested and fertile land to use as farms until their fertility is reduced, after  
359 which they move a new plot of land. Both can be understood as specific forms of the general strategy  
360 of alternation modelled here, with periods of grazing or cultivation corresponding to 'colonialism', and  
361 the migratory periods corresponding to 'nomadism'. Contrary to common representations and earlier  
362 ecological critiques of these practices as 'unsustainable', our results show that this is far from neces-  
363 sary. Indeed, there are conditions under which these practices are not only sustainable, but allow for  
364 unlimited territorial expansion. This potentially explains why both nomadic pastoralism and shifting  
365 cultivation have been so widespread for much of human history. Our model may thus provide a the-  
366 oretical foundation for the study of these practices in ecological anthropology, similar to how optimal  
367 foraging theory has been applied to the study of hunter-gatherer societies<sup>49</sup>. Further analysis of the  
368 model could produce new insights about these practices, such as the relationship between the length of  
369 fallow periods (i.e. the nomadic phase) and the number of neighboring habitats, or the impact of phase  
370 difference between neighboring habitats on total population levels.

371 By providing an elegant and rigorous framework that can explain a variety of ecological behavior-  
372 switching phenomena, our model unifies them into a conceptual whole, allowing general predictions  
373 about the chances of survival to be made, and laying the ground for research advances that apply across  
374 domains. As a manifestation of Parrondo's paradox, it also suggests one possible approach to the quite  
375 different paradox of 'sustainable development'. Not all forms of development are sustainable, but  
376 perhaps by taking a leaf from the long history of human practices that are environmentally destructive

377 yet paradoxically sustainable, new ways can be found to manage the resources of this planet.

## 378 References

- 379 [1] Clive G Jones, John H Lawton, and Moshe Shachak. Organisms as ecosystem engineers. In *Ecosys-*  
380 *tem management*, pages 130–147. Springer, 1994.
- 381 [2] Kim Cuddington, Will G Wilson, and Alan Hastings. Ecosystem engineers: feedback and popula-  
382 tion dynamics. *The American Naturalist*, 173(4):488–498, 2009.
- 383 [3] Clive G Jones, John H Lawton, and Moshe Shachak. Positive and negative effects of organisms as  
384 physical ecosystem engineers. *Ecology*, 78(7):1946–1957, 1997.
- 385 [4] Zong Xuan Tan and Kang Hao Cheong. Nomadic-colonial life strategies enable paradoxical sur-  
386 vival and growth despite habitat destruction. *eLife*, 6:e21673, 2017.
- 387 [5] Melvyn C Goldstein, Cynthia M Beall, RP Cincotto, et al. Traditional nomadic pastoralism and  
388 ecological conservation on tibet’s northern plateau. *National Geographic Research*, 6(2):139–156, 1990.
- 389 [6] Elliot Fratkin and Robin Mearns. Sustainability and pastoral livelihoods: lessons from east african  
390 maasai and mongolia. *Human organization*, 62(2):112–122, 2003.
- 391 [7] Jefferson Fox, Dao Minh Truong, A Terry Rambo, Nghiem Phuong Tuyen, Le Trong Cuc, and  
392 Stephen Leisz. Shifting cultivation: a new old paradigm for managing tropical forests. *BioScience*,  
393 50(6):521–528, 2000.
- 394 [8] Lori Ann Thrupp, Susanne Hecht, John O Browder, Owen J Lynch, Nabiha Megateli, and William  
395 O’Brien. *The diversity and dynamics of shifting cultivation: Myths, realities, and policy implications*.  
396 World Resources Institute Washington, DC, 1997.
- 397 [9] Nigel R Franks and Charles R Fletcher. Spatial patterns in army ant foraging and migration: *Eciton*  
398 *burchelli* on barro colorado island, panama. *Behavioral Ecology and Sociobiology*, 12(4):261–270, 1983.
- 399 [10] Endah Sulistyawati, Ian R Noble, and Michael L Roderick. A simulation model to study land use  
400 strategies in swidden agriculture systems. *Agricultural Systems*, 85(3):271–288, 2005.
- 401 [11] Rohan Chandralal Wickramasuriya, Arnold K Bregt, Hedwig Van Delden, and Alex Hagen-  
402 Zanker. The dynamics of shifting cultivation captured in an extended constrained cellular au-  
403 tomata land use model. *Ecological Modelling*, 220(18):2302–2309, 2009.
- 404 [12] Ruth Mace. Nomadic pastoralists adopt subsistence strategies that maximise long-term household  
405 survival. *Behavioral Ecology and Sociobiology*, 33(5):329–334, 1993.
- 406 [13] Gunnar Dressler, Birgit Mueller, and Karin Frank. Mobility—a panacea for pastoralism? an  
407 ecological-economic modelling approach. *Proceedings of the 6th International Congress On Environ-*  
408 *mental Modelling And Software*, 2012.
- 409 [14] Graham H Pyke. Optimal foraging theory: a critical review. *Annual review of ecology and systematics*,  
410 15(1):523–575, 1984.
- 411 [15] Peter A Hambäck. Seasonality, optimal foraging, and prey coexistence. *The American Naturalist*,  
412 152(6):881–895, 1998.
- 413 [16] Joel S Brown and Michael L Rosenzweig. Habitat selection in slowly regenerating environments.  
414 *Journal of Theoretical Biology*, 123(2):151–171, 1986.
- 415 [17] JG Ollason. Learning to forage in a regenerating patchy environment: can it fail to be optimal?  
416 *Theoretical Population Biology*, 31(1):13–32, 1987.

- 417 [18] Ilkka Hanski. Metapopulation dynamics. *Nature*, 396(6706):41, 1998.
- 418 [19] Sean Nee and Robert M May. Dynamics of metapopulations: habitat destruction and competitive  
419 coexistence. *Journal of Animal Ecology*, pages 37–40, 1992.
- 420 [20] Atte Moilanen and Ilkka Hanski. Habitat destruction and coexistence of competitors in a spatially  
421 realistic metapopulation model. *Journal of Animal Ecology*, 64(1):141–144, 1995.
- 422 [21] Mats Gyllenberg and Ilkka Hanski. Habitat deterioration, habitat destruction, and metapopulation  
423 persistence in a heterogenous landscape. *Theoretical population biology*, 52(3):198–215, 1997.
- 424 [22] WSC Gurney and JH Lawton. The population dynamics of ecosystem engineers. *Oikos*, pages  
425 273–283, 1996.
- 426 [23] Justin P Wright, William SC Gurney, and Clive G Jones. Patch dynamics in a landscape modified  
427 by ecosystem engineers. *Oikos*, 105(2):336–348, 2004.
- 428 [24] Paul David Williams and Alan Hastings. Paradoxical persistence through mixed-system dynamics:  
429 towards a unified perspective of reversal behaviours in evolutionary ecology. *Proceedings of the  
430 Royal Society of London B: Biological Sciences*, page rspb20102074, 2011.
- 431 [25] Jonathan M Levine and Mark Rees. Effects of temporal variability on rare plant persistence in  
432 annual systems. *The American Naturalist*, 164(3):350–363, 2004.
- 433 [26] Denise M. Wolf, Vijay V. Vazirani, and Adam P. Arkin. Diversity in times of adversity: probabilistic  
434 strategies in microbial survival games. *Journal of theoretical biology*, 234(2):227–253, 2005.
- 435 [27] Vincent AA Jansen and Jin Yoshimura. Populations can persist in an environment consisting of  
436 sink habitats only. *Proceedings of the National Academy of Sciences*, 95(7):3696–3698, 1998.
- 437 [28] Gregory P. Harmer and Derek Abbott. Game theory: Losing strategies can win by parrondo’s  
438 paradox. *Nature*, 402(6764):864–864, 1999.
- 439 [29] Juan MR Parrondo, Gregory P. Harmer, and Derek Abbott. New paradoxical games based on  
440 brownian ratchets. *Physical Review Letters*, 85(24):5226, 2000.
- 441 [30] Gregory P. Harmer, Derek Abbott, Peter G. Taylor, and Juan M. R. Parrondo. Brownian ratchets  
442 and parrondo’s games. *Chaos: An Interdisciplinary Journal of Nonlinear Science*, 11(3):705–714, 2001.
- 443 [31] S. N. Ethier and Jiyeon Lee. Parrondo games with two-dimensional spatial dependence. *Fluctuation  
444 and Noise Letters*, 16(1):1750005, 2017.
- 445 [32] Derek Abbott. Asymmetry and disorder: A decade of parrondo’s paradox. *Fluctuation and Noise  
446 Letters*, 9(1):129–156, 2010.
- 447 [33] Ye Ye, Kang Hao Cheong, Yu-wan Cen, and Neng-gang Xie. Effects of behavioral patterns and  
448 network topology structures on parrondo’s paradox. *Scientific Reports (Nature)*, 6:srep37028, 2016.
- 449 [34] Wayne Wah Ming Soo and Kang Hao Cheong. Parrondo’s paradox and complementary parrondo  
450 processes. *Physica A: Statistical Mechanics and its Applications*, 392(1):17–26, 2013.
- 451 [35] J.S. Cánovas, A. Linero, and D. Peralta-Salas. Dynamic parrondo’s paradox. *Physica D: Nonlinear  
452 Phenomena*, 218(2):177–184, 2006.
- 453 [36] Kang Hao Cheong and Wayne Wah Ming Soo. Construction of novel stochastic matrices for anal-  
454 ysis of parrondo’s paradox. *Physica A: Statistical Mechanics and its Applications*, 392(20):4727–4738,  
455 2013.

- 456 [37] Wayne Wah Ming Soo and Kang Hao Cheong. Occurrence of complementary processes in par-  
457 rondo's paradox. *Physica A: Statistical Mechanics and its Applications*, 412:180–185, 2014.
- 458 [38] Kang Hao Cheong, Zong Xuan Tan, Neng-gang Xie, and Michael Jones. A paradoxical evolution-  
459 ary mechanism in stochastically switching environments. *Scientific Reports (Nature)*, 6:srep34889,  
460 2016.
- 461 [39] Marius-F Danca and Dejian Lai. Parrondo's game model to find numerically stable attractors of a  
462 tumor growth model. *International Journal of Bifurcation and Chaos*, 22(10):1250258, 2012.
- 463 [40] Mary M Crossan and David K Hurst. Strategic renewal as improvisation: Reconciling the tension  
464 between exploration and exploitation. In *Ecology and Strategy*, pages 273–298. Emerald Group  
465 Publishing Limited, 2006.
- 466 [41] Sigrunn Eliassen, Christian Jørgensen, Marc Mangel, and Jarl Giske. Exploration or exploitation:  
467 life expectancy changes the value of learning in foraging strategies. *Oikos*, 116(3):513–523, 2007.
- 468 [42] Oded Berger-Tal, Jonathan Nathan, Ehud Meron, and David Saltz. The exploration-exploitation  
469 dilemma: a multidisciplinary framework. *PloS one*, 9(4):e95693, 2014.
- 470 [43] Katja Mehlhorn, Ben R Newell, Peter M Todd, Michael D Lee, Kate Morgan, Victoria A Braithwaite,  
471 Daniel Hausmann, Klaus Fiedler, and Cleotilde Gonzalez. Unpacking the exploration–exploitation  
472 tradeoff: A synthesis of human and animal literatures. *Decision*, 2(3):191, 2015.
- 473 [44] A Dan Tarlock. Ideas without institutions: The paradox of sustainable development. *Ind. J. Global  
474 Legal Stud.*, 9:35, 2001.
- 475 [45] Rob Krueger and David Gibbs. *The sustainable development paradox: Urban political economy in the  
476 United States and Europe*. Guilford Press, 2007.
- 477 [46] Yosef Jabareen. A new conceptual framework for sustainable development. *Environment, develop-  
478 ment and sustainability*, 10(2):179–192, 2008.
- 479 [47] Przemyslaw Bogacki and Lawrence F Shampine. A 3 (2) pair of runge-kutta formulas. *Applied  
480 Mathematics Letters*, 2(4):321–325, 1989.
- 481 [48] JT Bonner. Evolutionary strategies and developmental constraints in the cellular slime molds. *The  
482 American Naturalist*, 119(4):530–552, 1982.
- 483 [49] Eric Alden Smith, Robert L Bettinger, Charles A Bishop, Valda Blundell, Elizabeth Cashdan,  
484 Michael J Casimir, Andrew L Christenson, Bruce Cox, Rada Dyson-Hudson, Brian Hayden, et al.  
485 Anthropological applications of optimal foraging theory: a critical review [and comments and re-  
486 ply]. *Current Anthropology*, 24(5):625–651, 1983.
